# Supplementary material for: Synthesis of Two Porous CdS Rods by Anion Exchange Method and Their Photocatalytic Properties
Source: MDPI journal article supplement (doi:10.3390/nano12183190), 2022-09-14
Supplement: s1 [file s1]

Electronic Supplementary Material

Synthesis of two porous CdS rods by anion exchange method and their photocatalytic properties

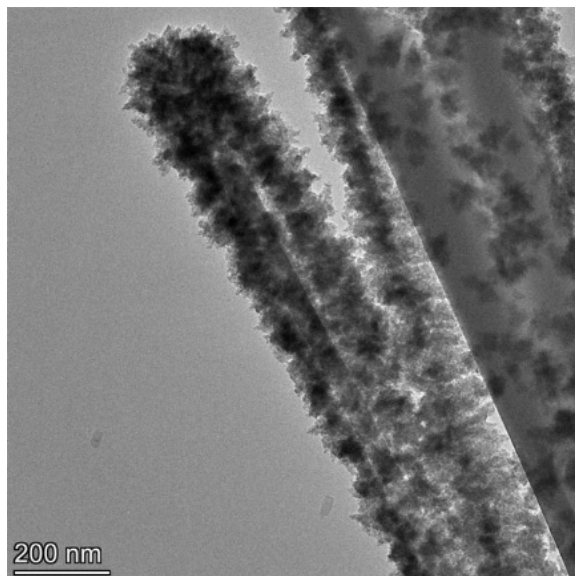

**Figure S1:** TEM image of Cd-Cys@CdS core-shell rods.

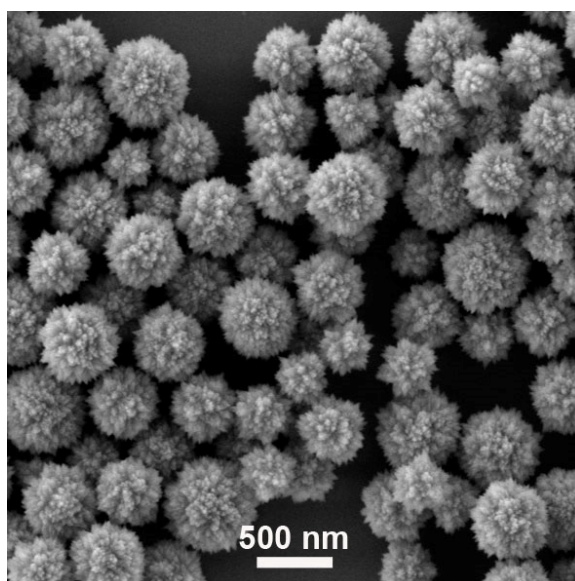

**Figure S2:** SEM image of CdS SSs. Typically, 1 mmol  $\text{Cd}(\text{NO}_3)_2$  and 2 mmol cysteine were dissolved in 30 mL deionized water to form a clear solution after stirring for 30 min. The solution was then transferred into a 50 mL autoclave. The autoclave was sealed and heated to 130 °C for 6 h and cooled naturally to room temperature.

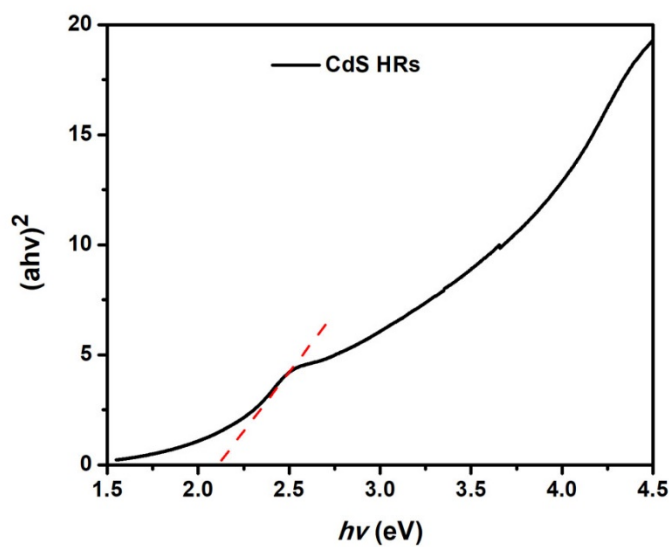

**Figure S3:** Tauc plots of the CdS HRs.

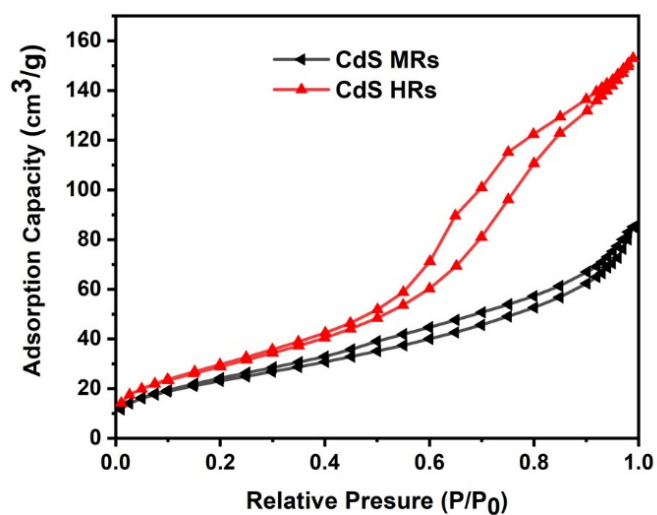

**Figure S4:** N<sub>2</sub> adsorption-desorption isotherms for CdS MRs and CdS HRs.

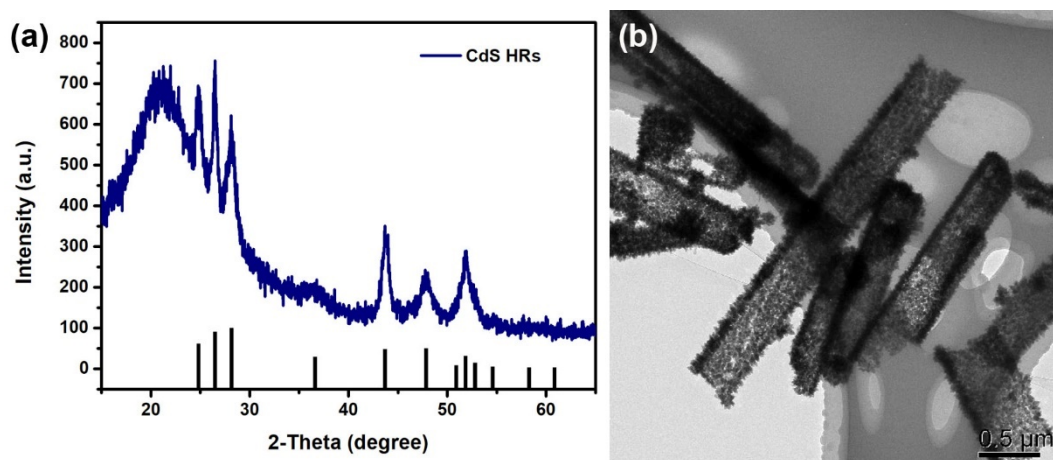

**Figure S5:** (a) XRD pattern and (b) TEM image of the CdS HRs after the cycling tests.
